# Supplementary material for: Resistance to pirimiphos-methyl in West African Anopheles is spreading via duplication and introgression of the Ace1 locus
Source: PubMed Central journal article supplement (PMC7853456; doi:10.1371/journal.pgen.1009253), 2021-01-21

Supplementary Material SM9

A) Density of phased variants around *Ace1* duplication region

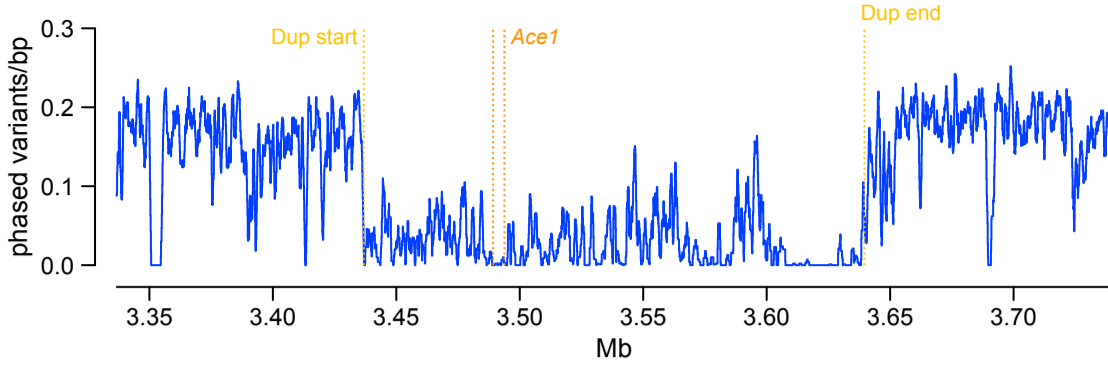

B) Density of phased variants within *Ace1* duplication region

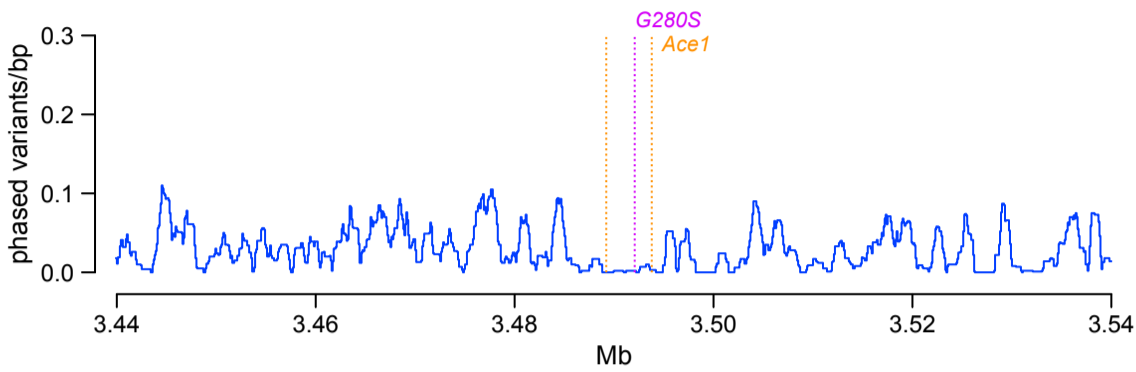

C) Linkage disequilibrium between *GG280S* and nearby phased variants

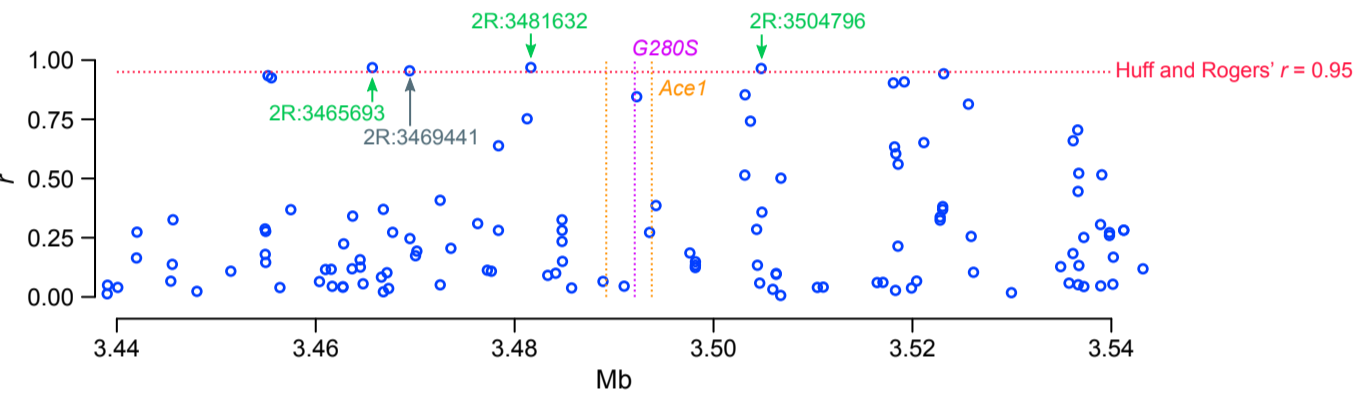

| chrom | pos     | LD with G280S | Freq C col | Phased? |
|-------|---------|---------------|------------|---------|
| 2R    | 3444618 | 0.97264516    | 0.4366     | 0       |
| 2R    | 3445910 | 0.9504605     | 0.4366     | 0       |
| 2R    | 3447556 | 0.96361303    | 0.4366     | 0       |
| 2R    | 3456166 | 0.9675373     | 0.4366     | 0       |
| 2R    | 3456937 | 0.97637683    | 0.4366     | 0       |
| 2R    | 3459582 | 0.9591772     | 0.4366     | 0       |
| 2R    | 3464705 | 0.96810204    | 0.4366     | 0       |
| 2R    | 3465693 | 0.96810204    | 0.4366     | 1 ***   |
| 2R    | 3466268 | 0.9719312     | 0.4366     | 0       |
| 2R    | 3469441 | 0.95479333    | 0.4366     | 1       |
| 2R    | 3469672 | 0.96308875    | 0.4366     | 0       |
| 2R    | 3475119 | 0.9658597     | 0.4366     | 0       |
| 2R    | 3477809 | 0.98811066    | 0.4366     | 0       |
| 2R    | 3478595 | 1.0           | 0.4366     | 0       |
| 2R    | 3479474 | 0.98421353    | 0.4366     | 0       |
| 2R    | 3480330 | 1.0           | 0.4366     | 0       |
| 2R    | 3480406 | 0.98421353    | 0.4366     | 0       |
| 2R    | 3481632 | 0.96864766    | 0.4295     | 1 ***   |
| 2R    | 3482092 | 0.9716037     | 0.4154     | 0       |
| 2R    | 3483376 | 0.99236995    | 0.4366     | 0       |
| 2R    | 3483539 | 1.0           | 0.4366     | 0       |
| 2R    | 3486607 | 0.9959919     | 0.4366     | 0       |
| 2R    | 3487859 | 1.0           | 0.4366     | 0       |
| 2R    | 3496635 | 0.98388374    | 0.4366     | 0       |
| 2R    | 3498622 | 0.96866876    | 0.4366     | 0       |
| 2R    | 3498740 | 0.97213244    | 0.4366     | 0       |
| 2R    | 3504796 | 0.96453327    | 0.4436     | 1 ***   |
| 2R    | 3507961 | 0.97605       | 0.4507     | 0       |

D) Profile of haplotype scores around *Ace1*

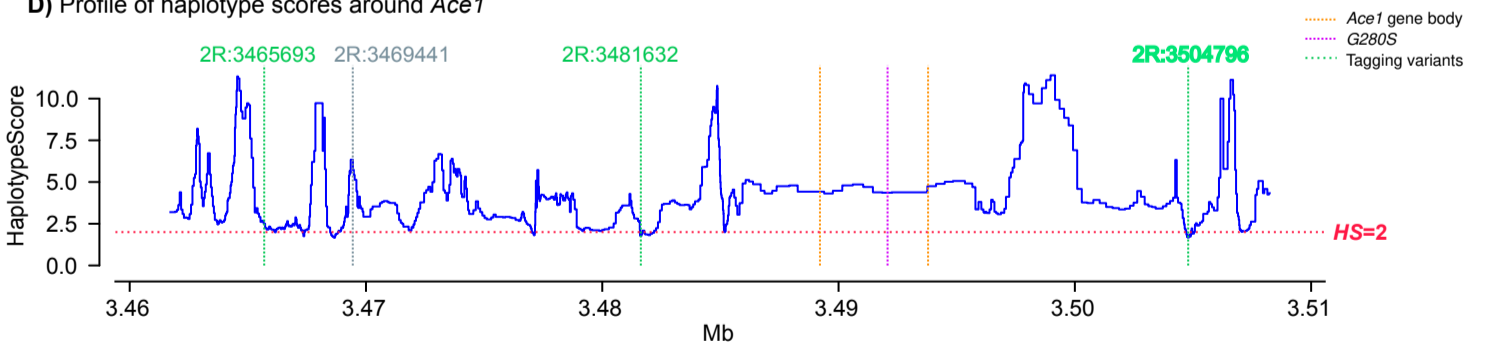

E) Haplotype score in *Ace1* and the tagging variants ( $\pm 300$ bp)

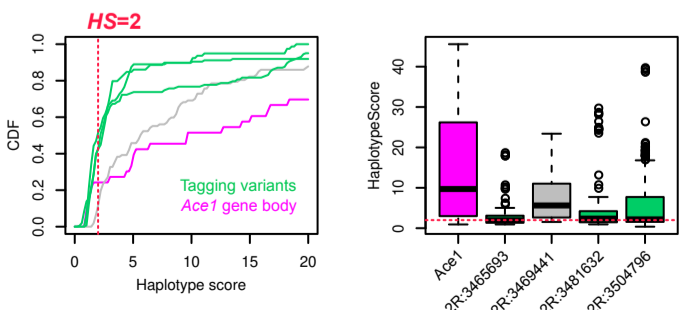

F) Sequencing depth in *Ace1* and the tagging variants (across samples)

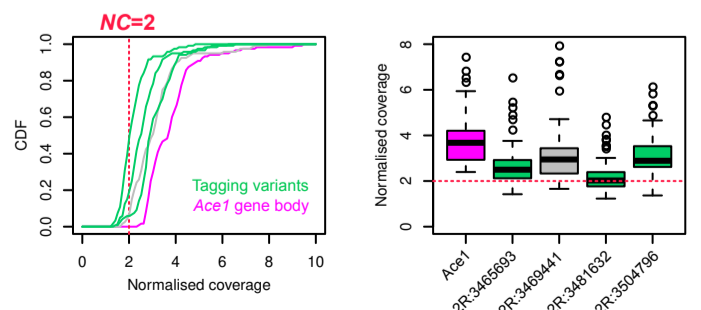

Supplement: pgen.1009253.s009.pdf [file pgen.1009253.s009.pdf]
