# Supplementary material for: Resistance to pirimiphos-methyl in West African Anopheles is spreading via duplication and introgression of the Ace1 locus
Source: PubMed Central journal article supplement (PMC7853456; doi:10.1371/journal.pgen.1009253), 2021-01-21

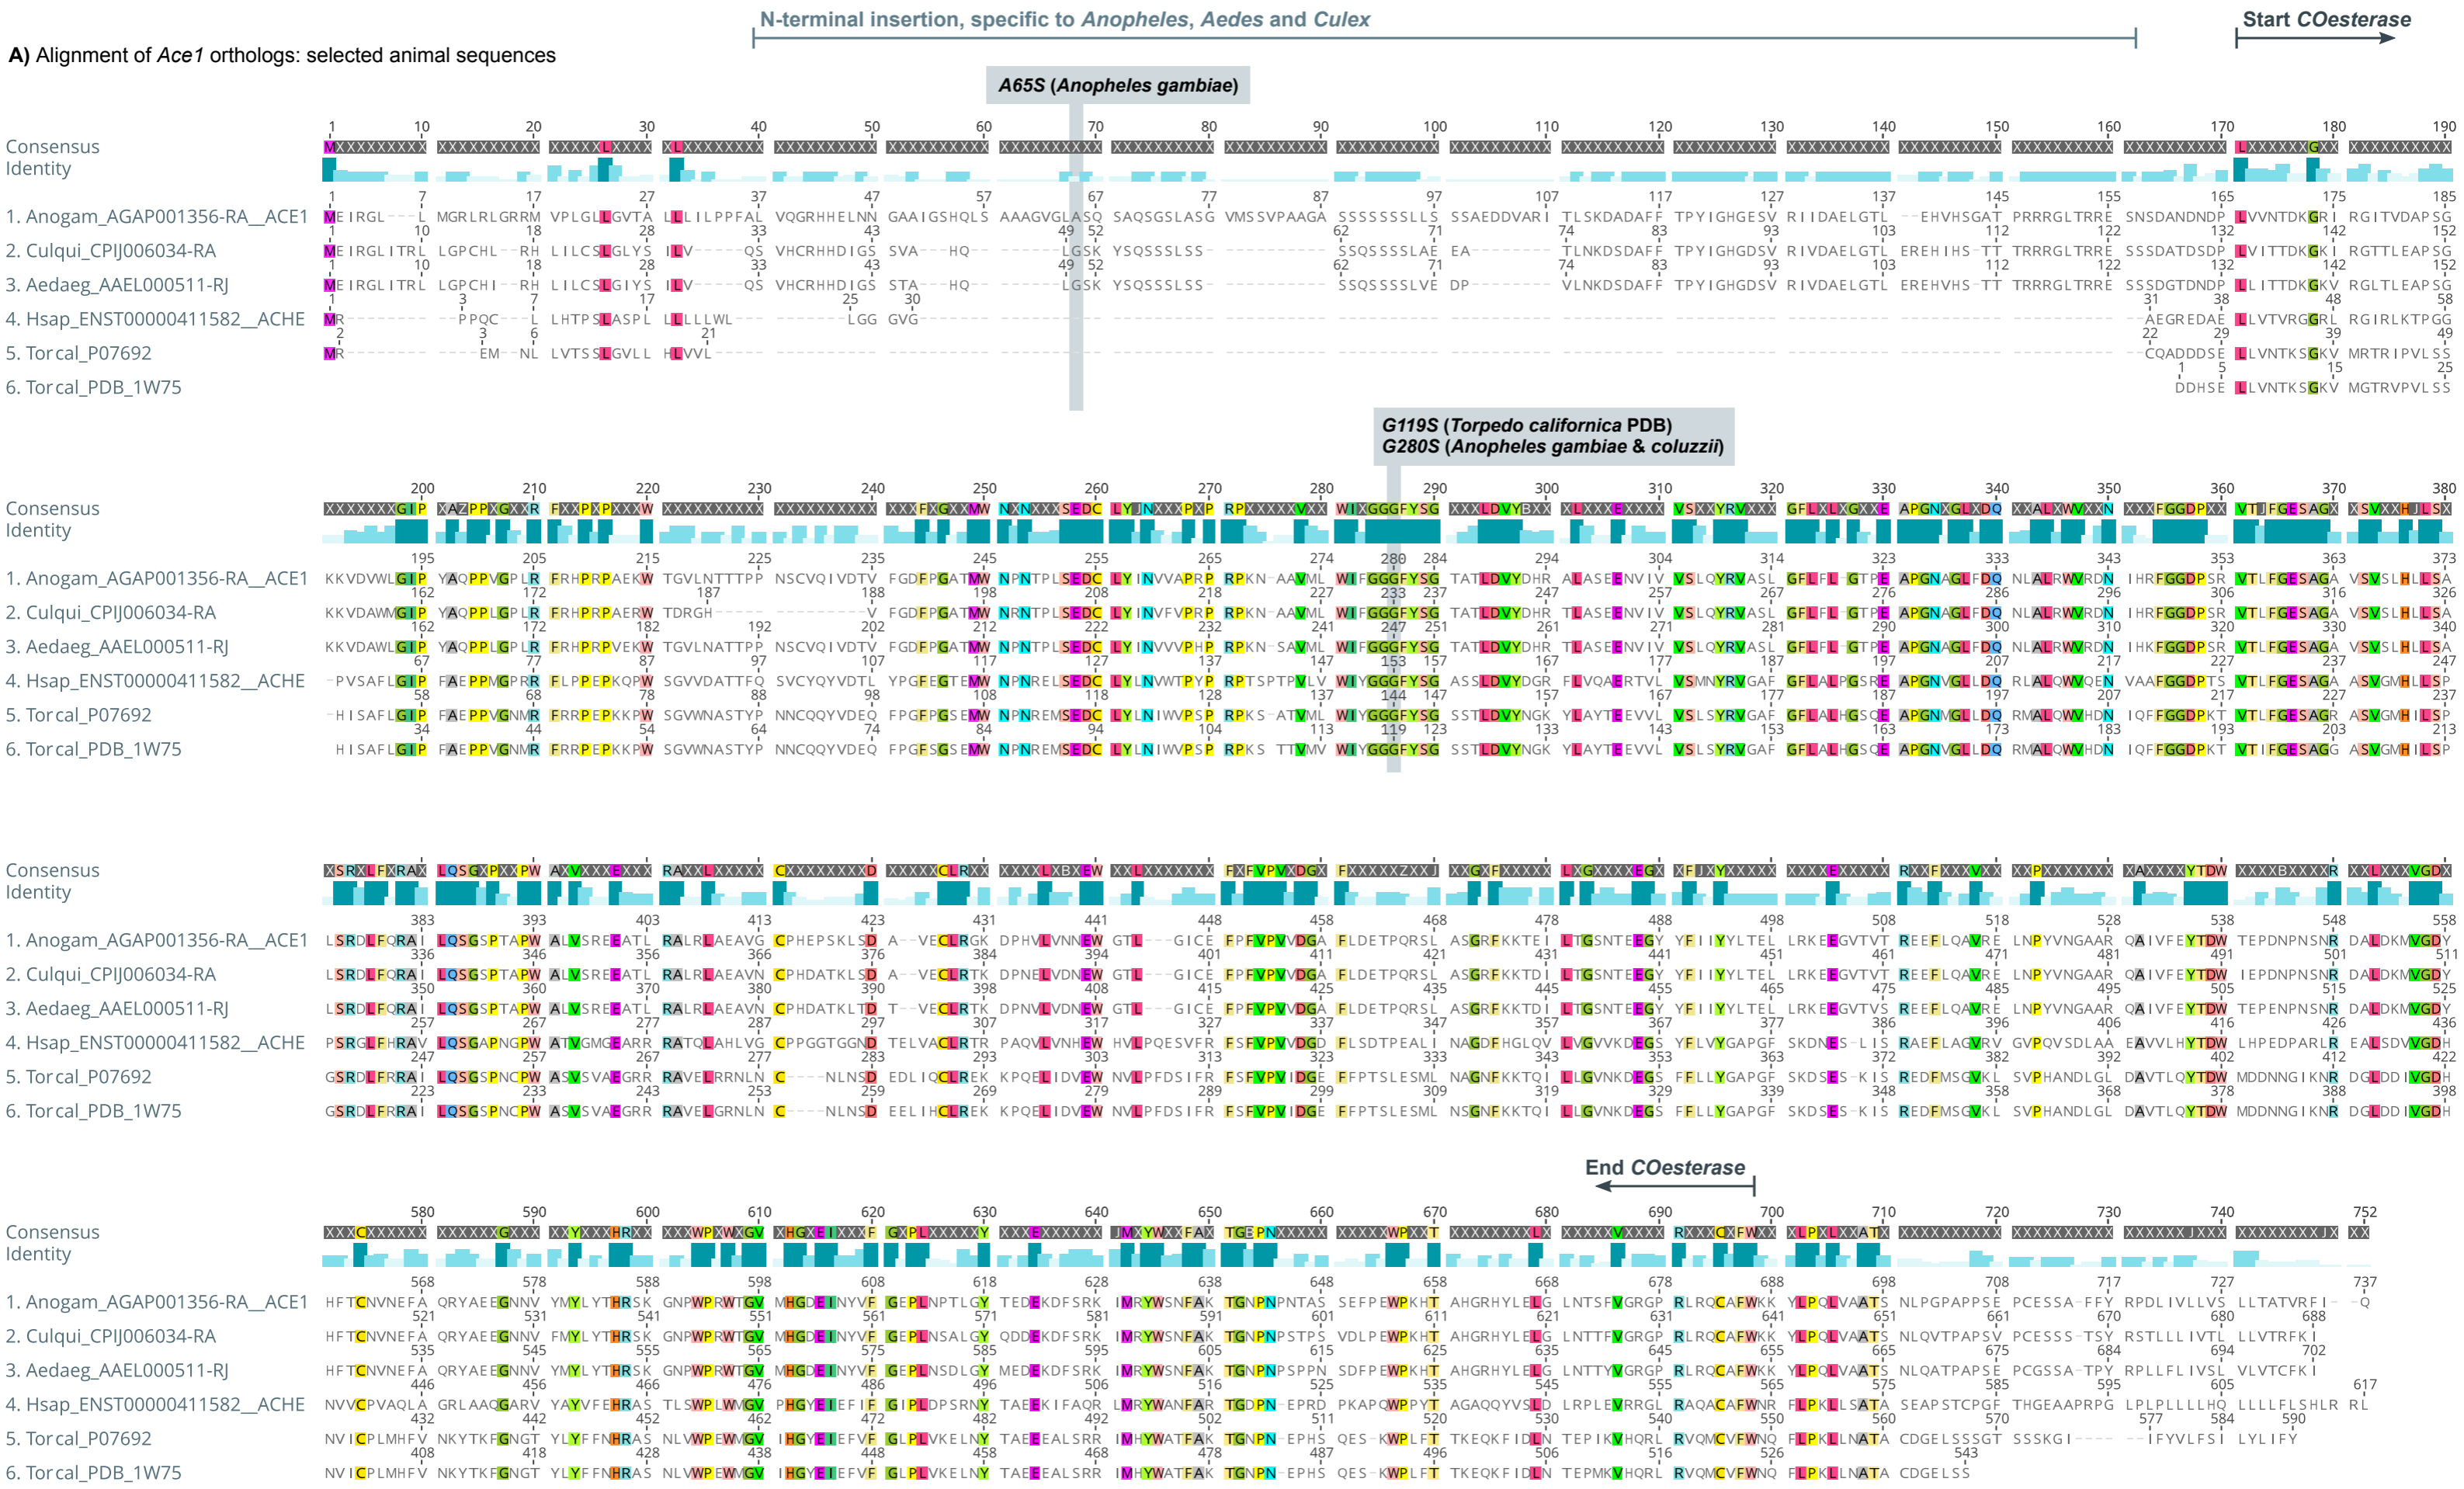

**B) Alignment of *Ace1* orthologs: *Anopheles*, *Culex* and *Aedes***

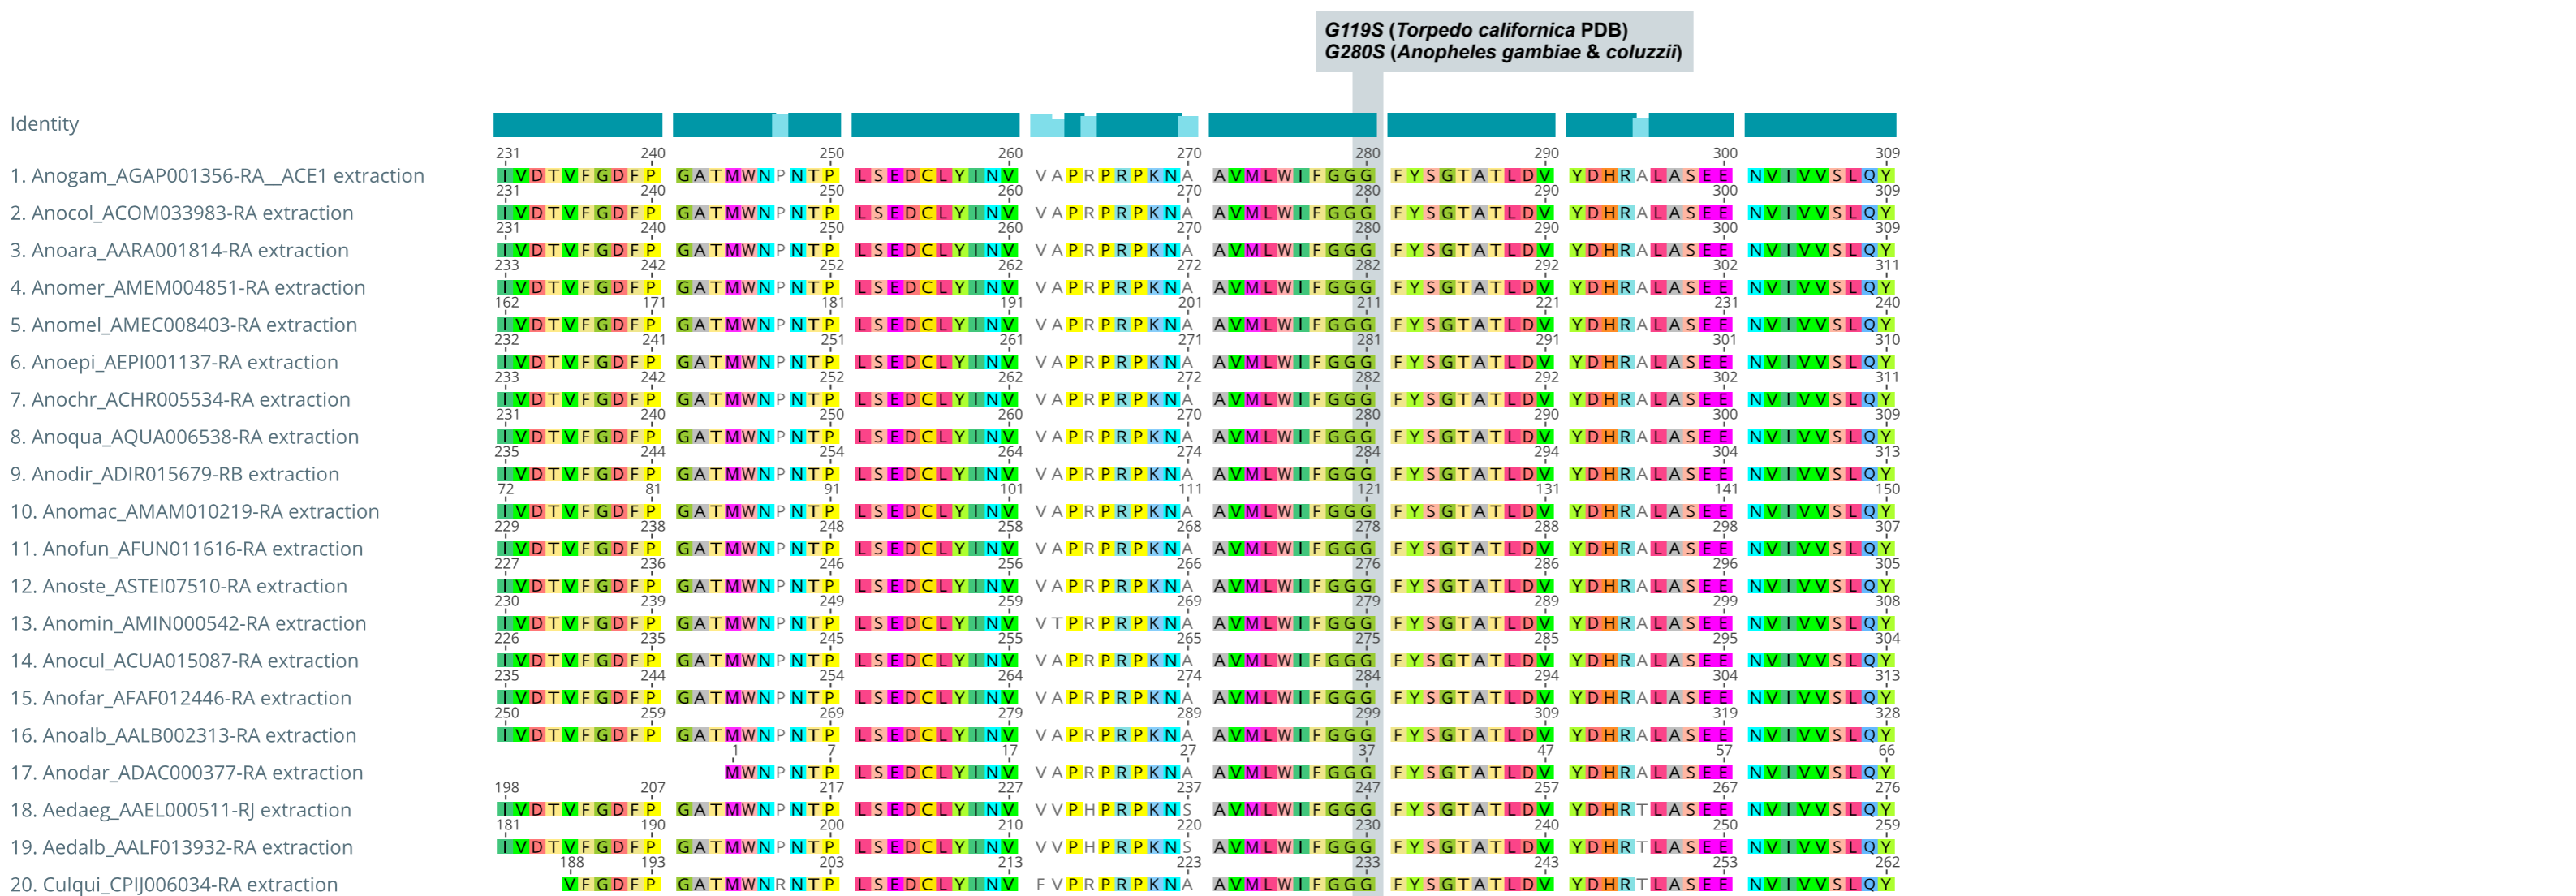

**C) Phylogenetic analysis *Ace* homologs**

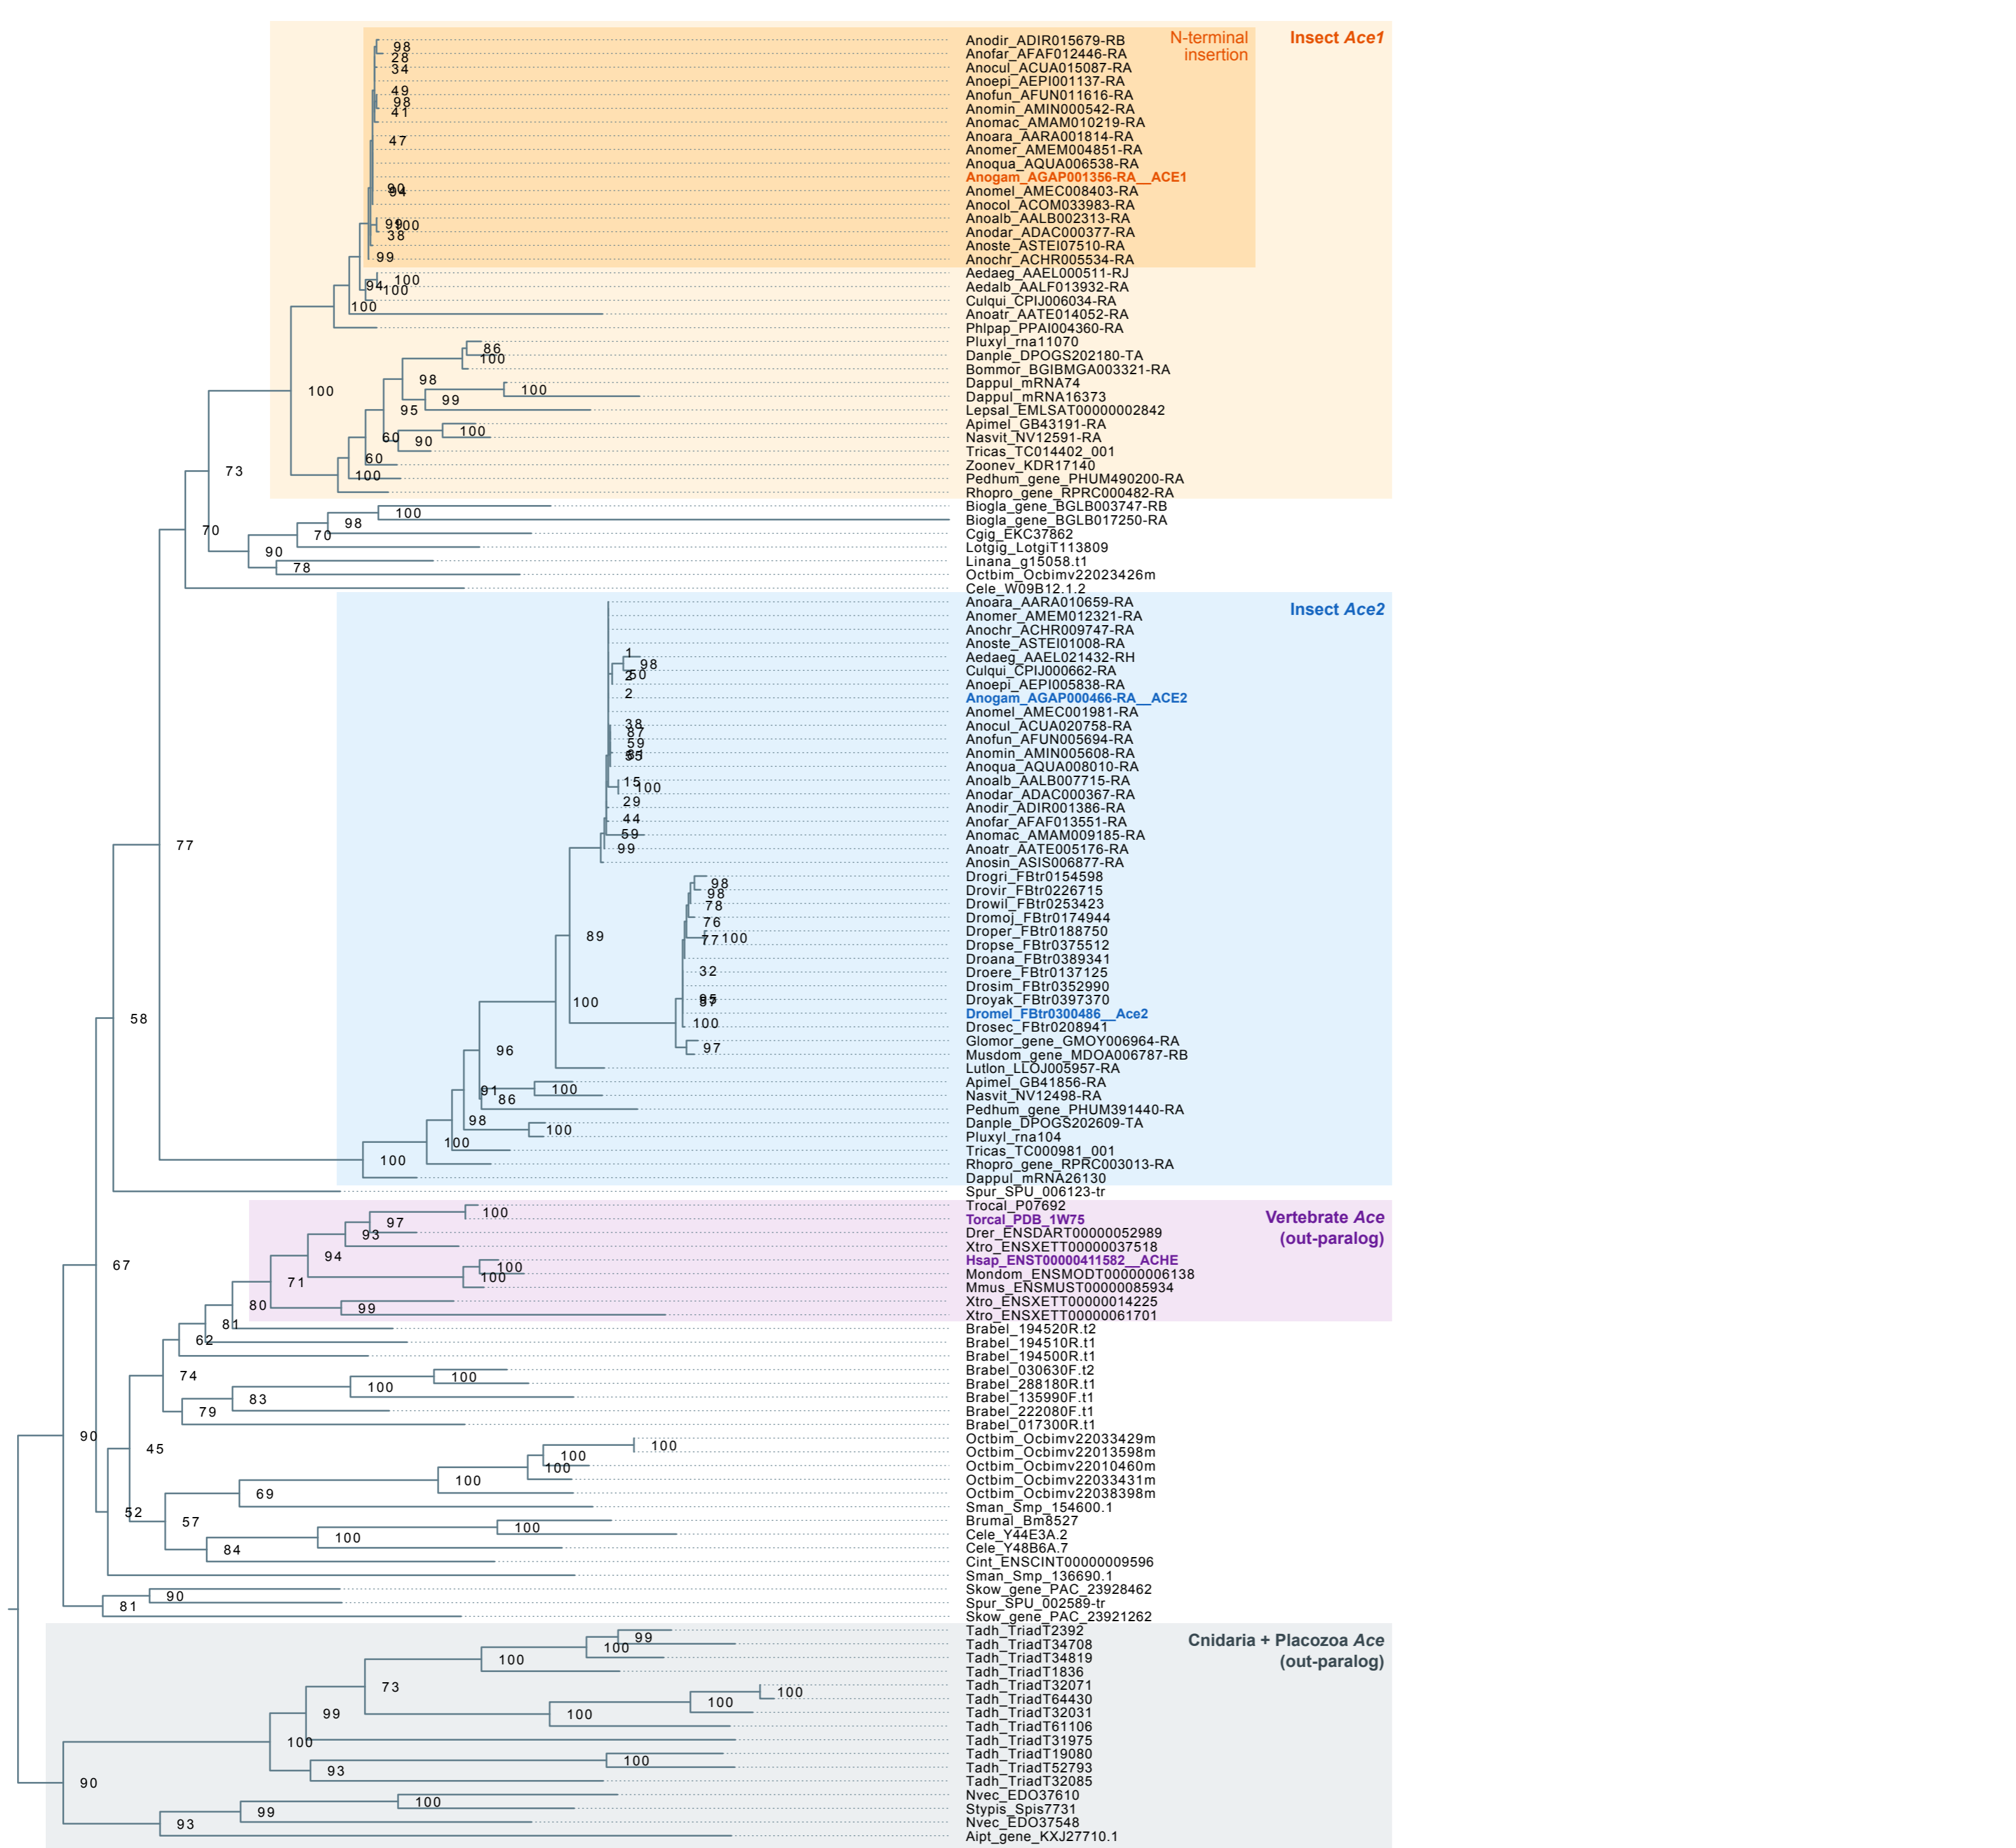

Supplement: pgen.1009253.s001.pdf [file pgen.1009253.s001.pdf]
