# Supplementary material for: Resistance to pirimiphos-methyl in West African Anopheles is spreading via duplication and introgression of the Ace1 locus
Source: PubMed Central journal article supplement (PMC7853456; doi:10.1371/journal.pgen.1009253), 2021-01-21

Supplementary Material SM12

A) Tagging variant 2R:3465693

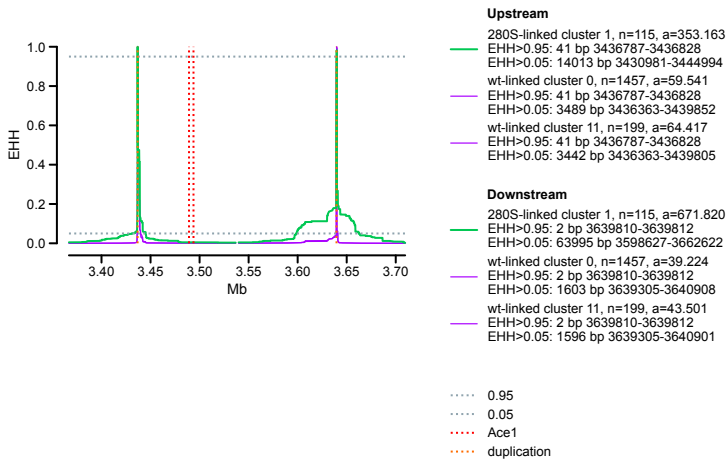

B) Tagging variant 2R:3469441

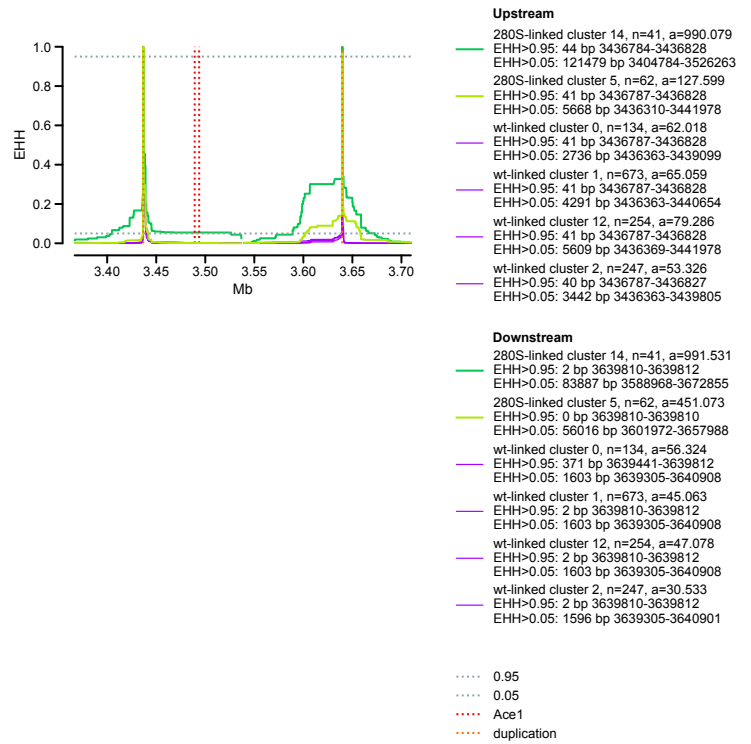

C) Tagging variant 2R:3481632

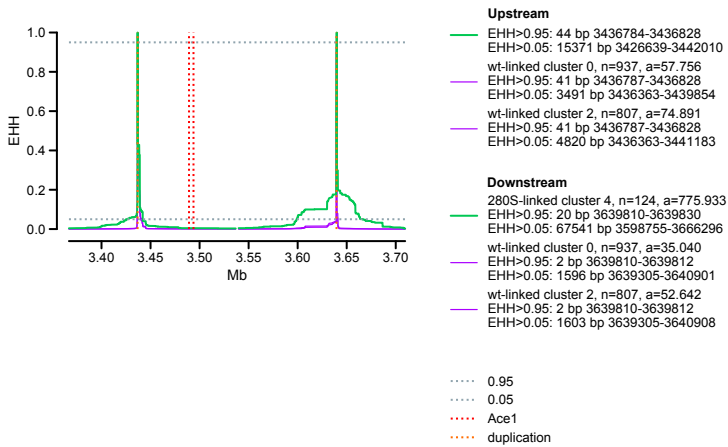

D) Tagging variant 2R:3504796

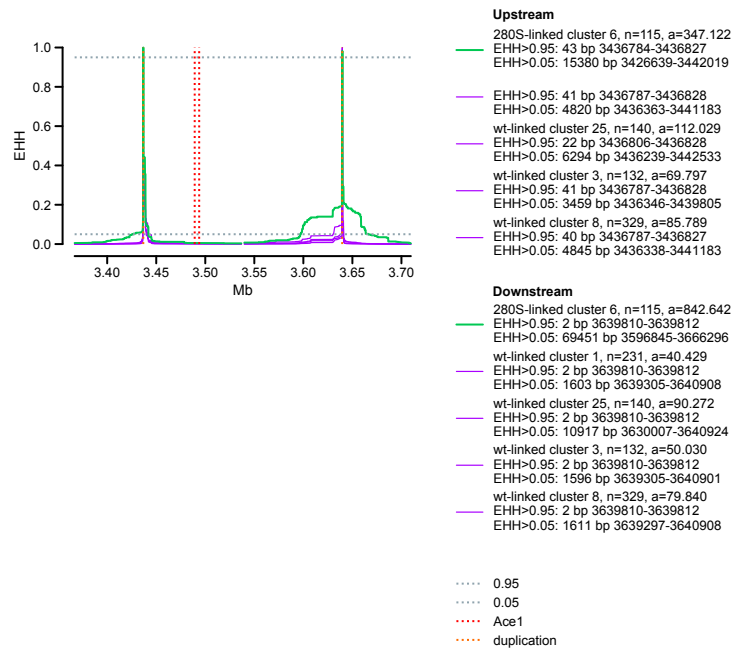

Supplement: pgen.1009253.s012.pdf [file pgen.1009253.s012.pdf]
