# Supplementary material for: Resistance to pirimiphos-methyl in West African Anopheles is spreading via duplication and introgression of the Ace1 locus
Source: PubMed Central journal article supplement (PMC7853456; doi:10.1371/journal.pgen.1009253), 2021-01-21

Supplementary Material SM13

A) Introgression in duplicated region, D=*A. arabiensis*

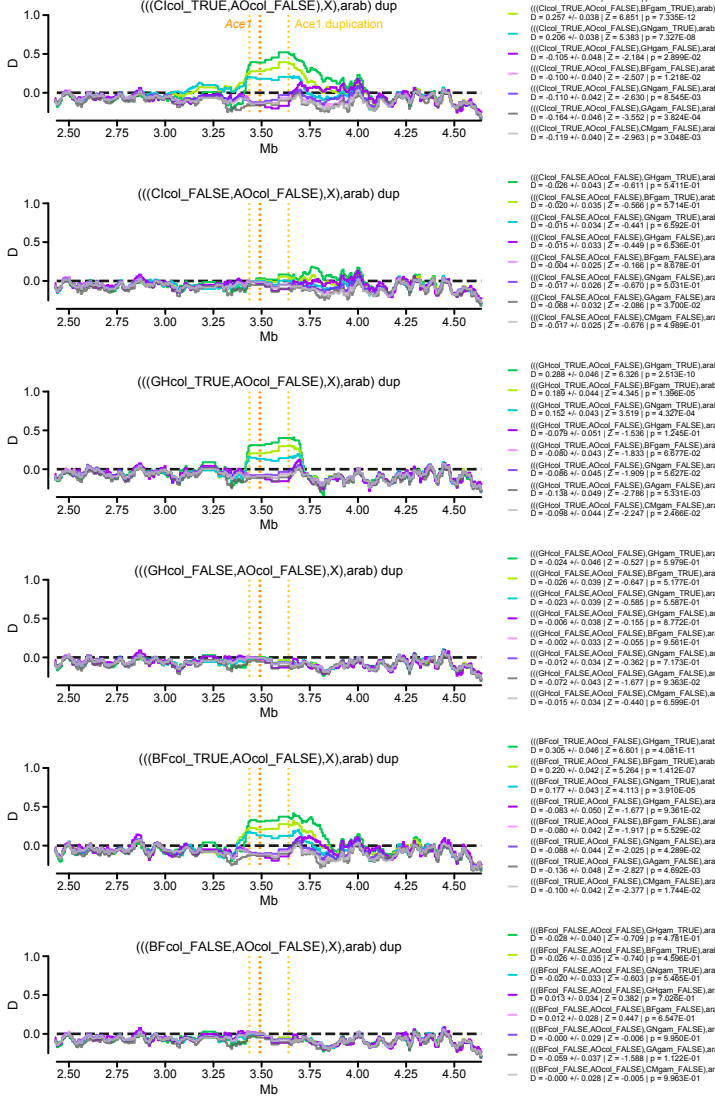

B) Introgression in duplicated region, D=*A. melas*

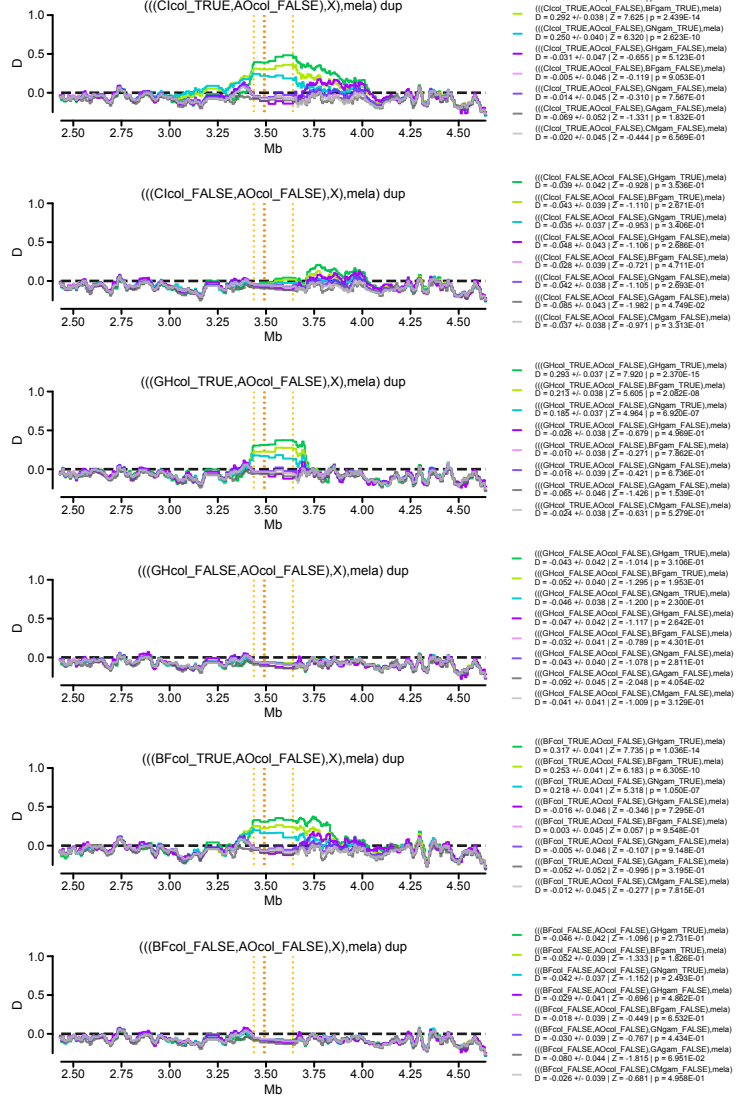

C) Introgression in duplicated region, D=*A. merus*

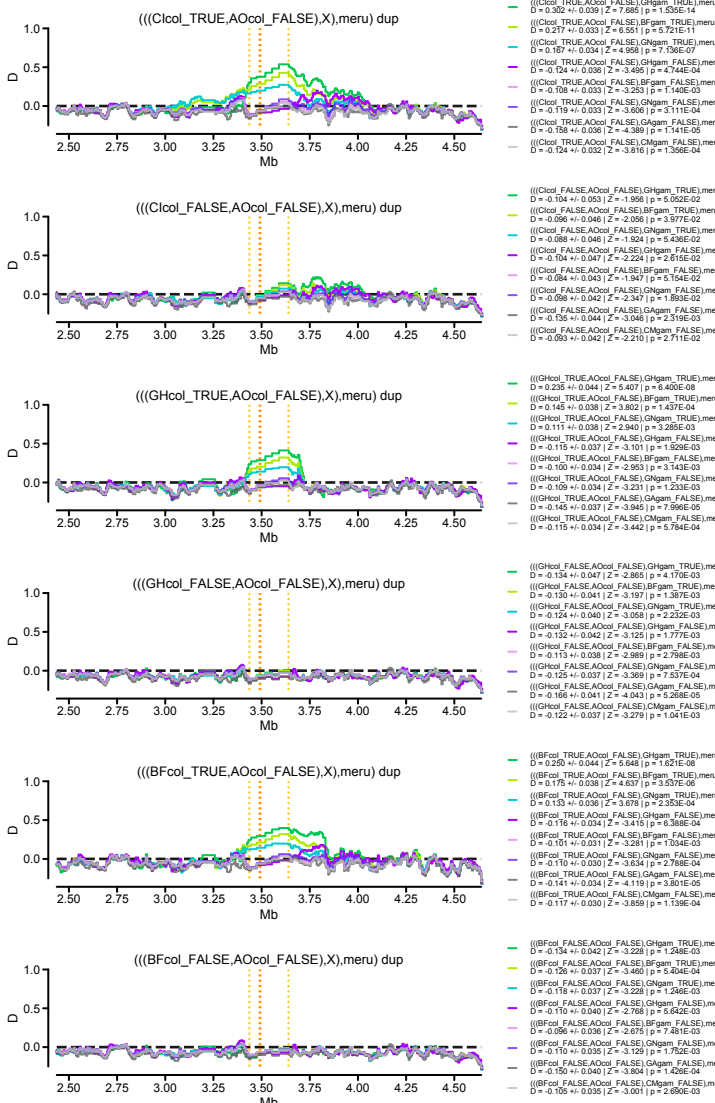

D) Introgression in duplicated region, D=*A. quadriannulatus*

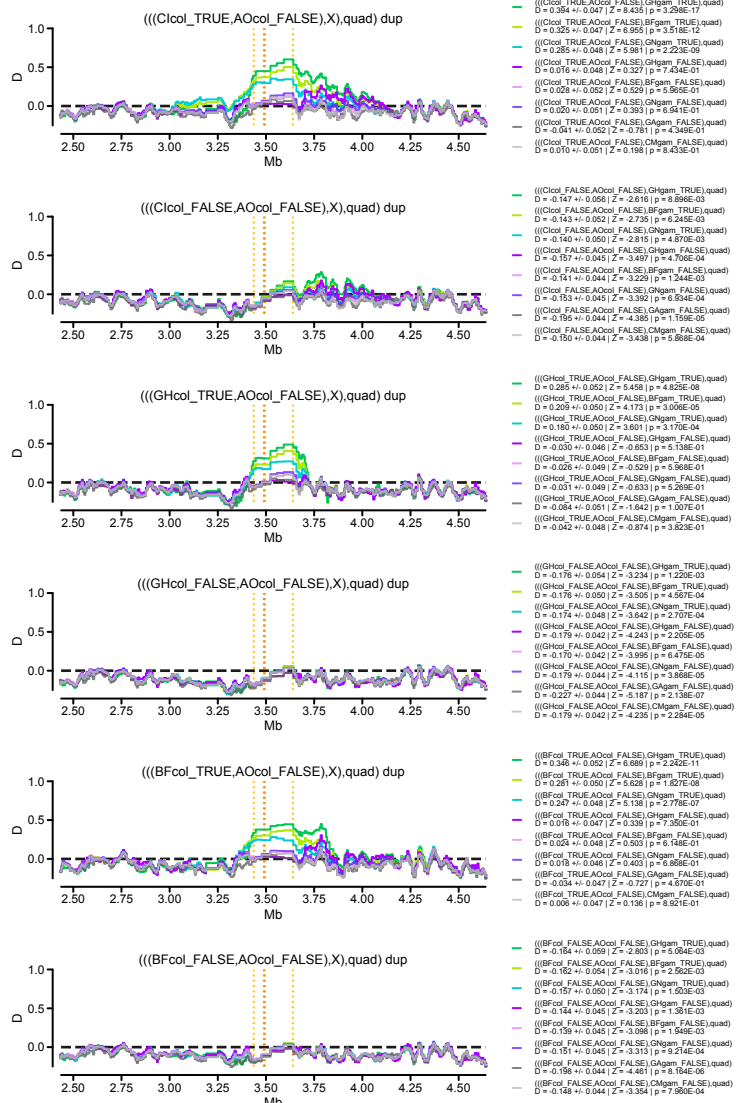

Supplement: pgen.1009253.s013.pdf [file pgen.1009253.s013.pdf]
