# Supplementary material for: Resistance to pirimiphos-methyl in West African Anopheles is spreading via duplication and introgression of the Ace1 locus
Source: PubMed Central journal article supplement (PMC7853456; doi:10.1371/journal.pgen.1009253), 2021-01-21

A) Duplication

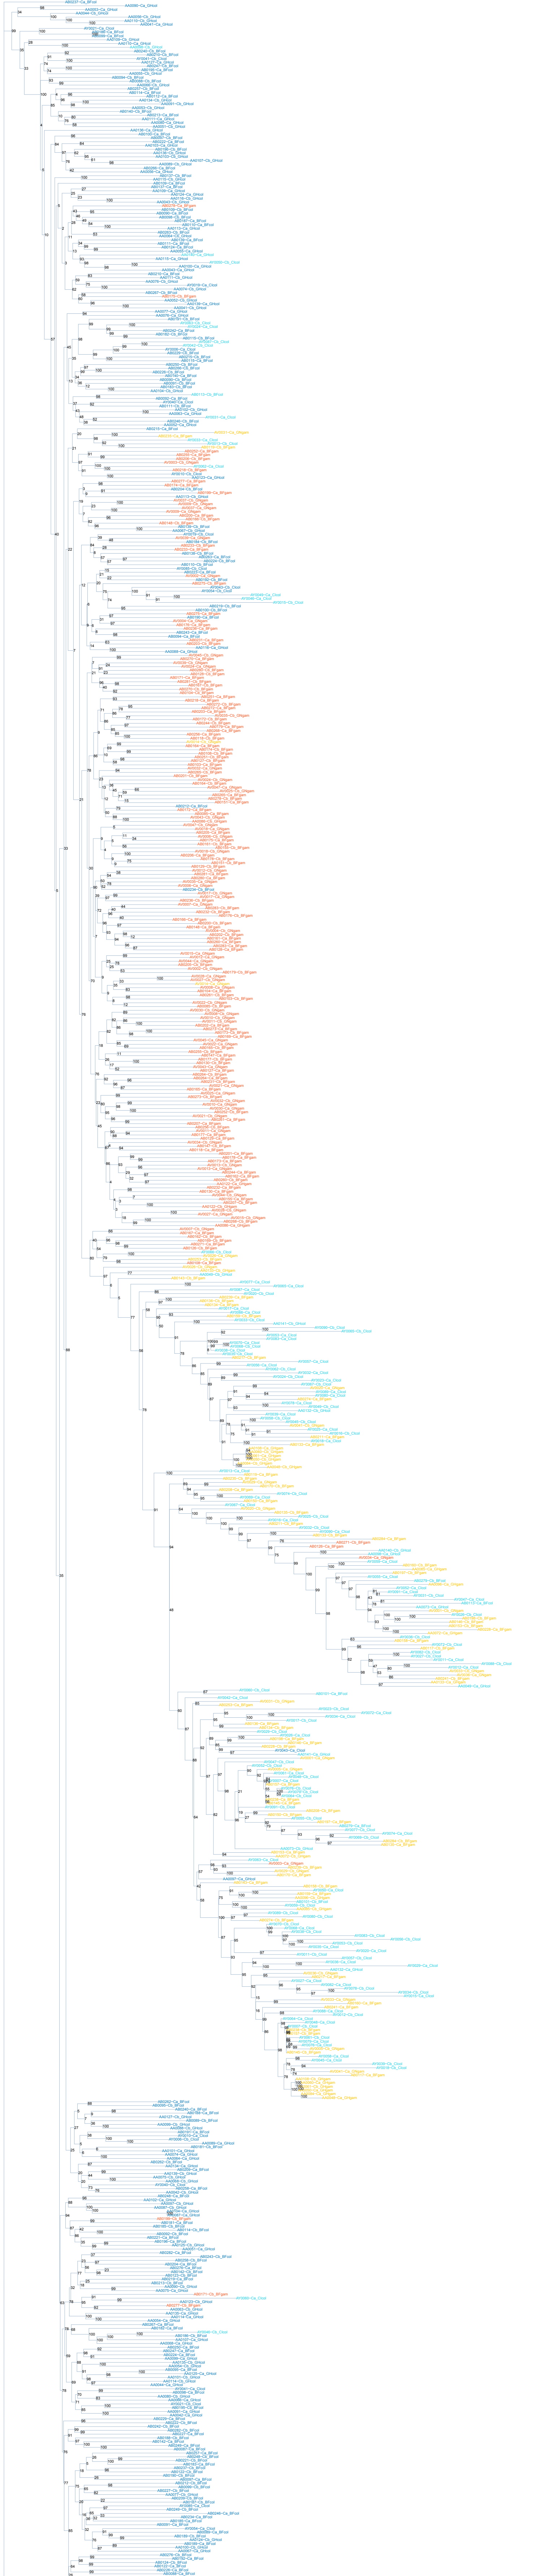



C) Upstream

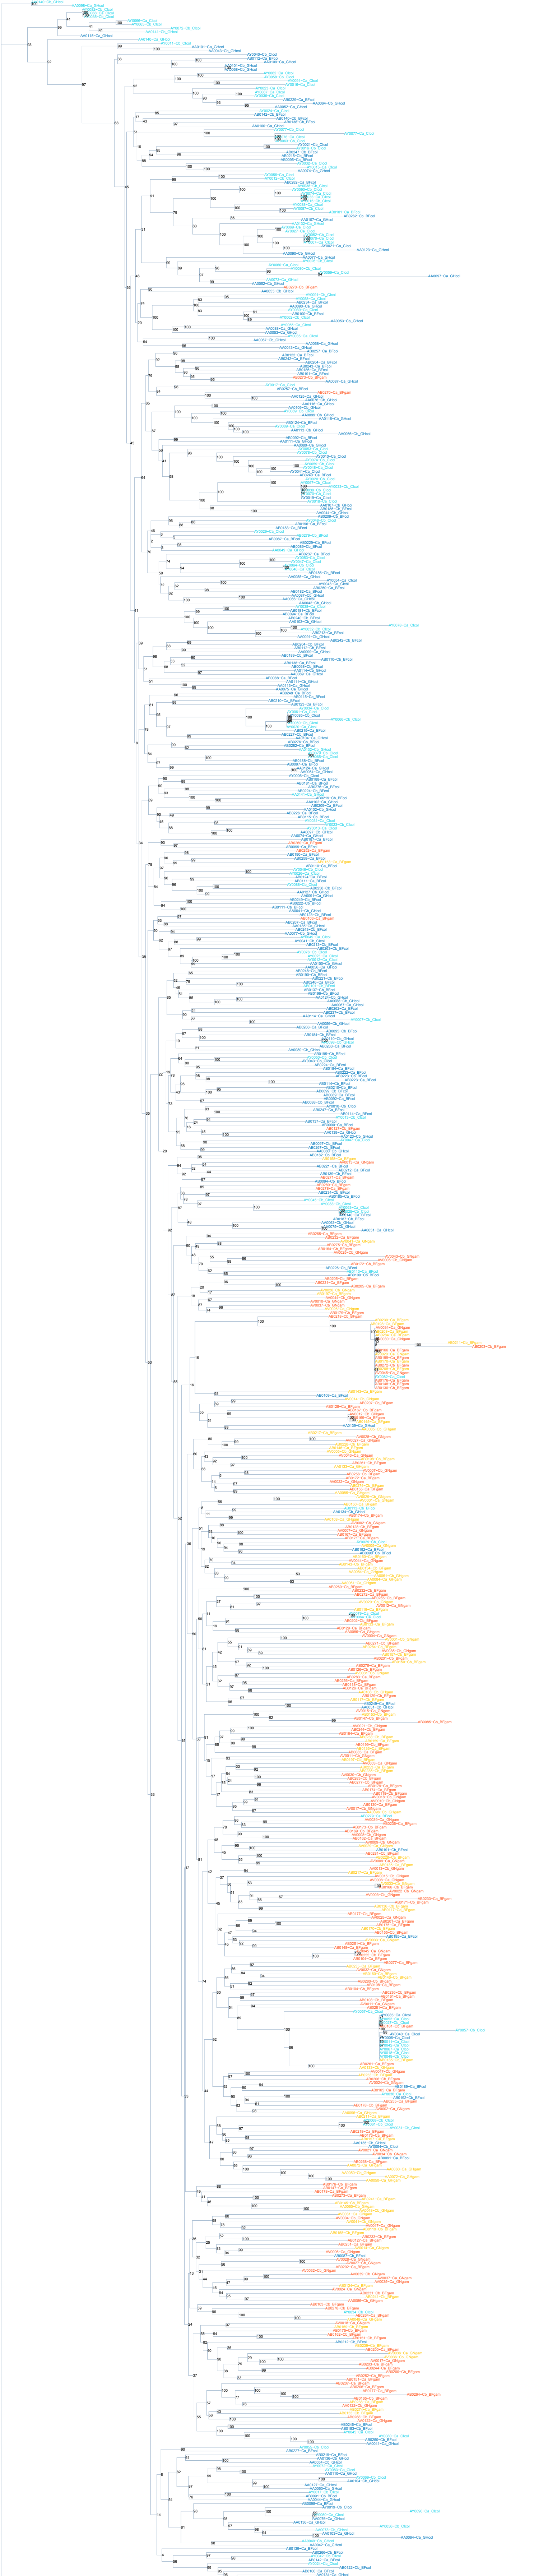

D) Downstream

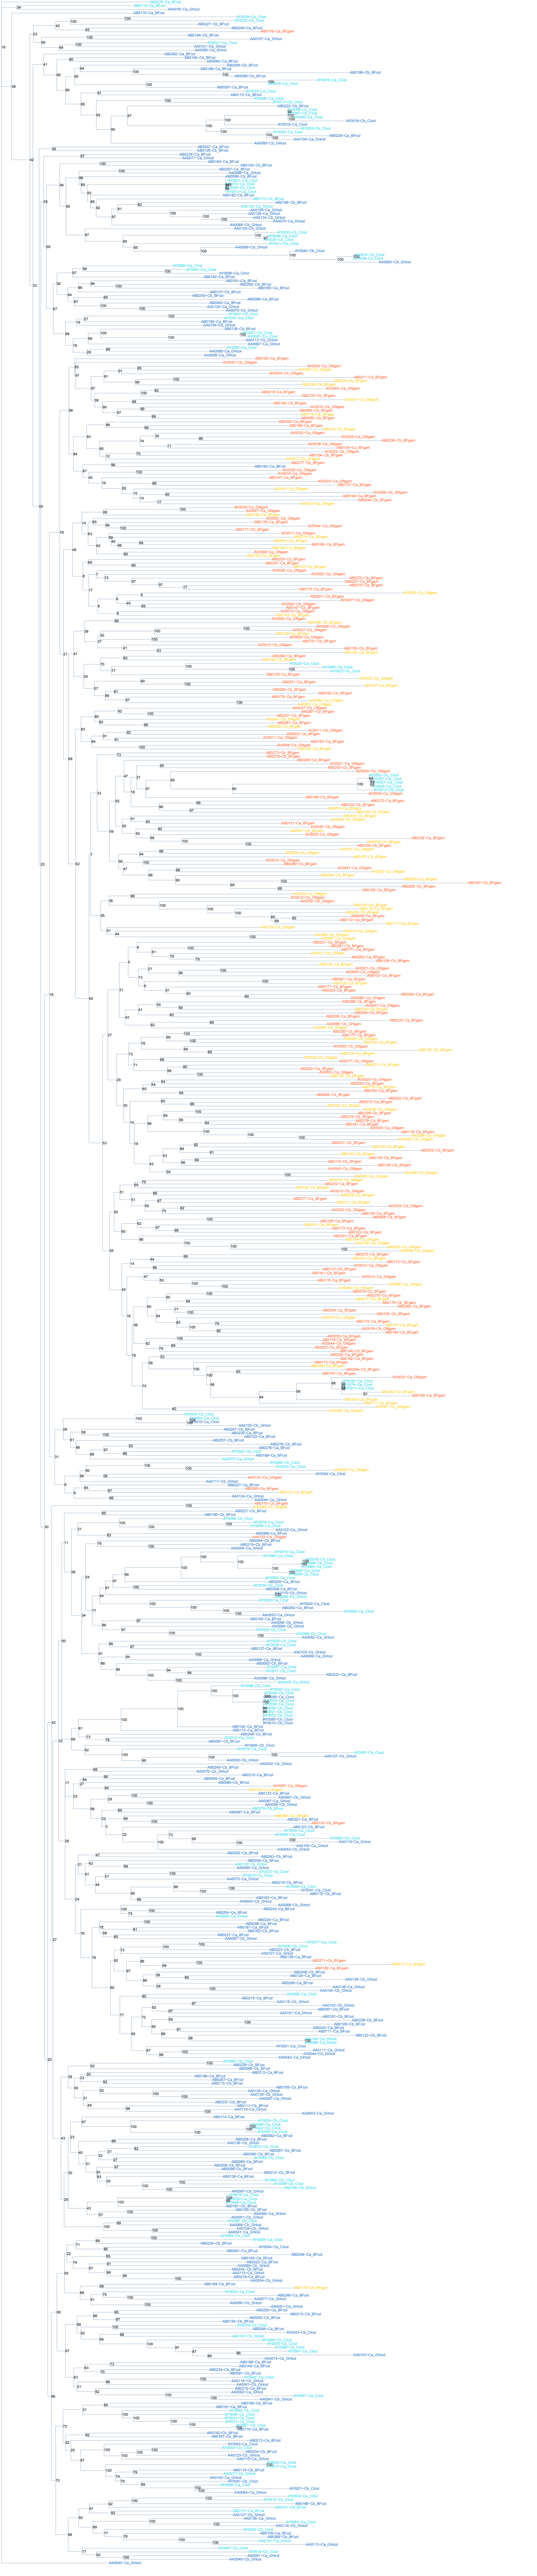

Supplement: pgen.1009253.s015.pdf [file pgen.1009253.s015.pdf]
