# Supplementary material for: Resistance to pirimiphos-methyl in West African Anopheles is spreading via duplication and introgression of the Ace1 locus
Source: PubMed Central journal article supplement (PMC7853456; doi:10.1371/journal.pgen.1009253), 2021-01-21

Supplementary Material SM16

A) Neighbour-joining trees of haplotypes within the high-PBS windows

● Resistant  
● Susceptible

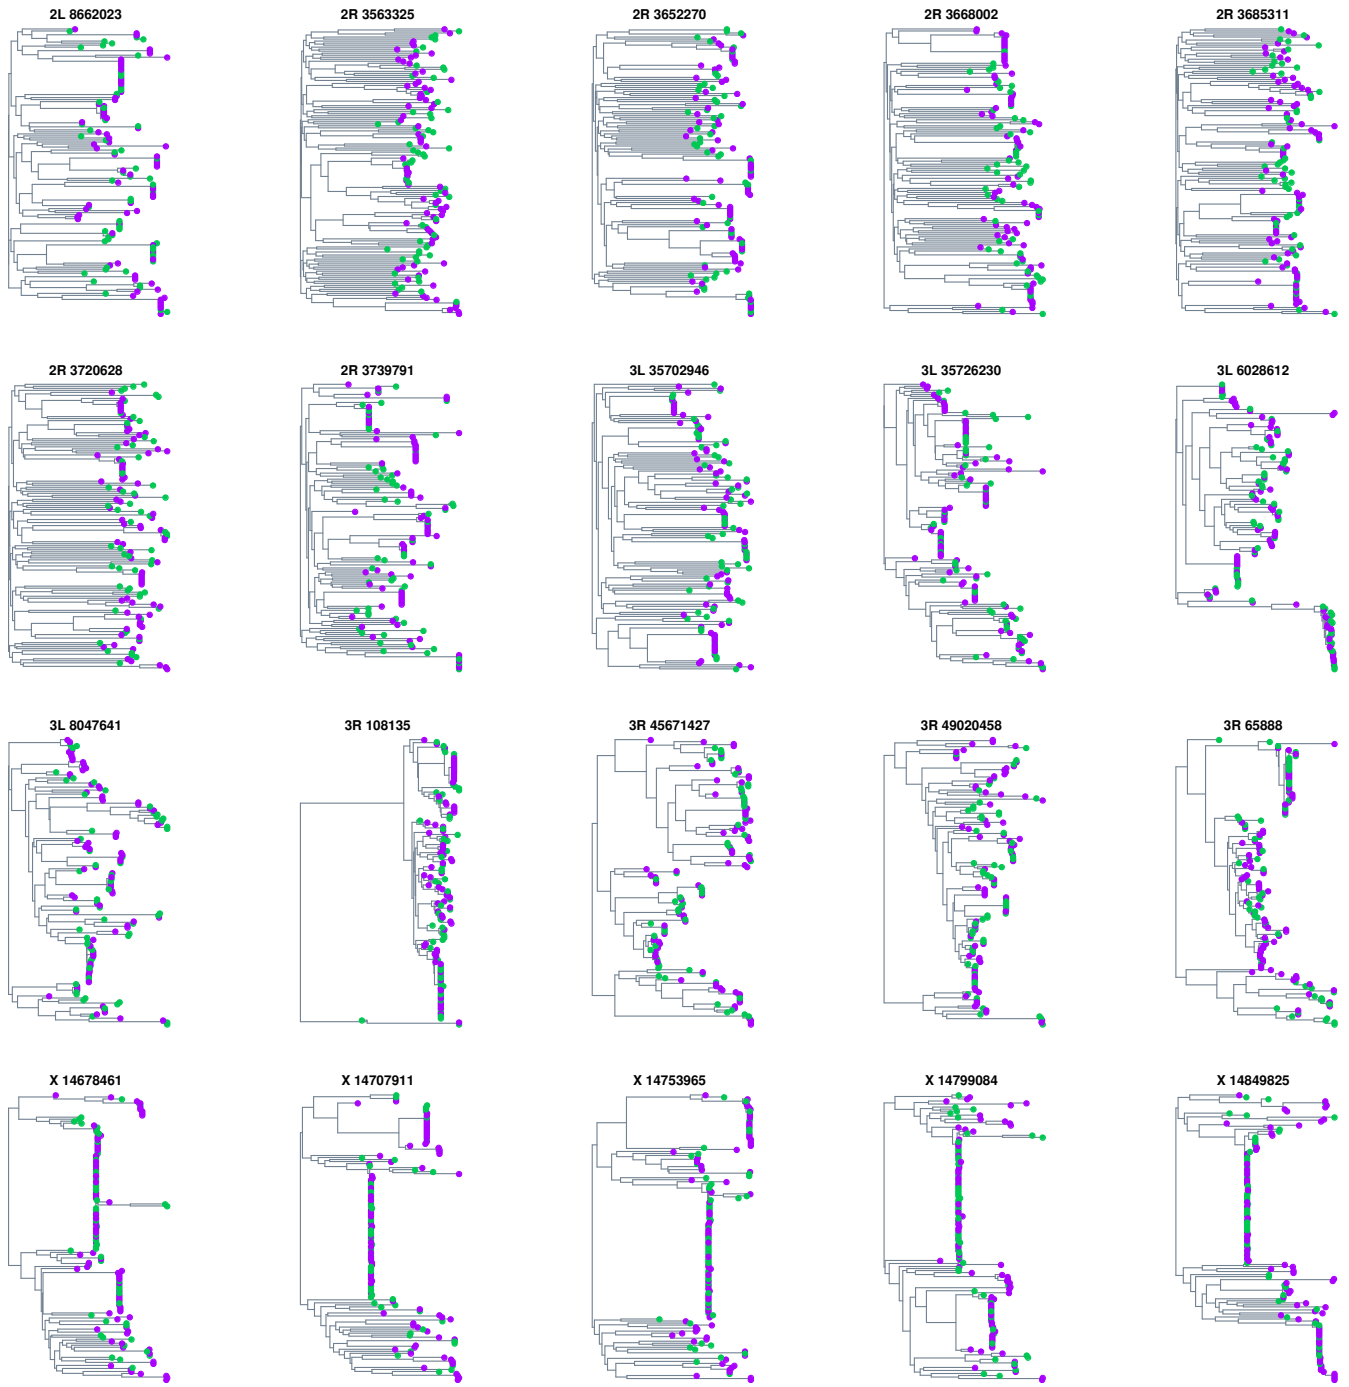

B) Profile of Garud  $H_{12}$  in the PBS peaks

— Resistant  
— Susceptible  
— All  
- - - high-PBS window

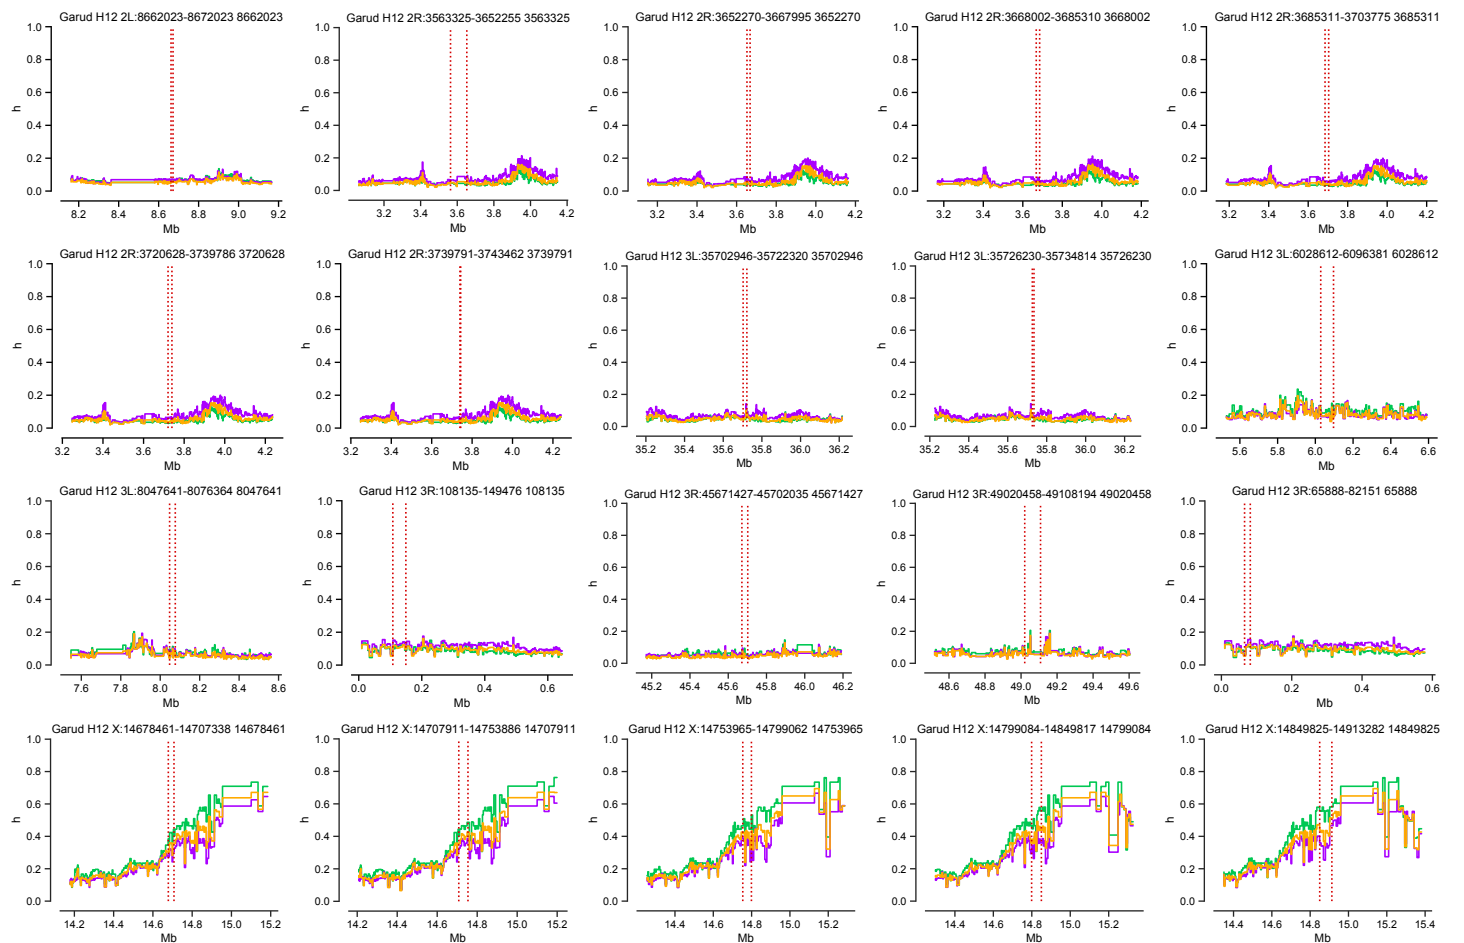

Supplement: pgen.1009253.s016.pdf [file pgen.1009253.s016.pdf]
