# Supplementary material for: Resistance to pirimiphos-methyl in West African Anopheles is spreading via duplication and introgression of the Ace1 locus
Source: PubMed Central journal article supplement (PMC7853456; doi:10.1371/journal.pgen.1009253), 2021-01-21

## Supplementary Material SM17

### A) Duplication breakpoints

| name                      | chrom | start   | end     | sequence (AgamP4, from Assogba 2016)  | window (Lucas et al. 2019) |
|---------------------------|-------|---------|---------|---------------------------------------|----------------------------|
| upstream_breakpoint_out   | 2R    | 3436893 | 3436926 | TCTTATCATGTGCTTGGTGACAATTTTGTTC       | 3436800 + 300bp            |
| upstream_breakpoint_in    | 2R    | 3436927 | 3436964 | GAATCCACGGAGCGGTGCGATTTAGGGCAGGACCGAT | 3436800 + 300bp            |
| downstream_breakpoint_in  | 2R    | 3639803 | 3639835 | ATATTTTCCCATTCTATTTTATCCGACGAAGC      | 3639600 + 300bp            |
| downstream_breakpoint_out | 2R    | 3639836 | 3639873 | AAACCTGCAAAGTGAACAATAAGCTCTATCTGCAAC  | 3639600 + 300bp            |

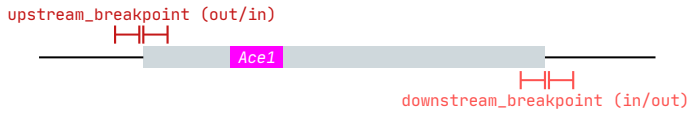

### B) Normalised coverage along the *Ace1* duplication

--- Major duplication breakpoints  
--- Minor duplication (Guinea)  
█ *Ace1* gene body

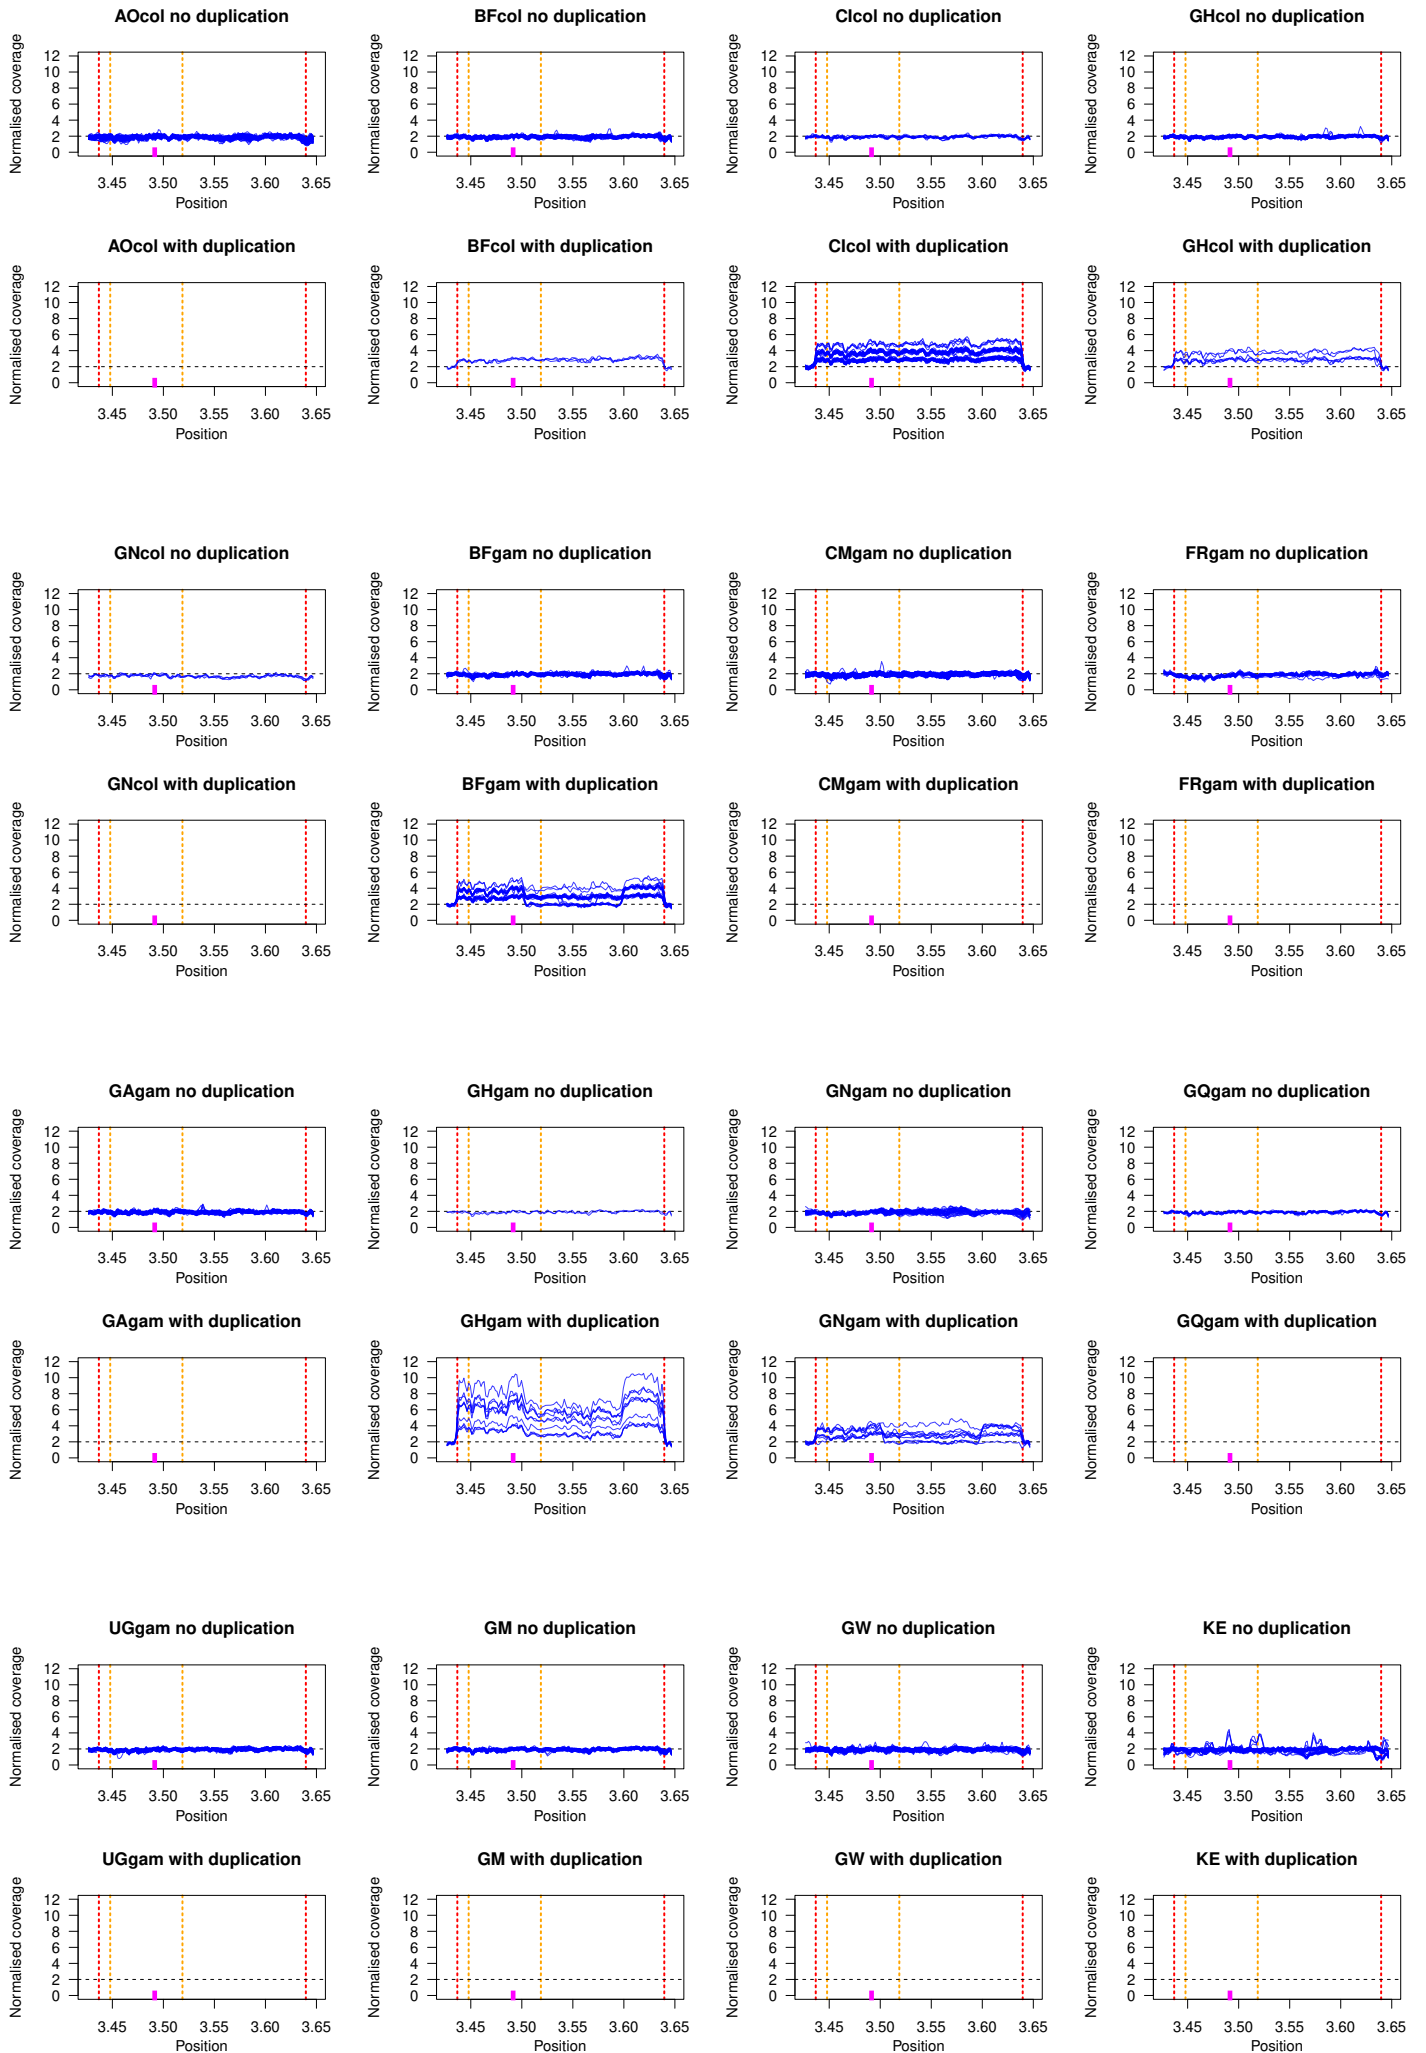

Supplement: pgen.1009253.s017.pdf [file pgen.1009253.s017.pdf]
