# Supplementary material for: Resistance to pirimiphos-methyl in West African Anopheles is spreading via duplication and introgression of the Ace1 locus
Source: PubMed Central journal article supplement (PMC7853456; doi:10.1371/journal.pgen.1009253), 2021-01-21

## Supplementary Material SM18

### A) Distance from *A. coluzzii* duplicated specimens

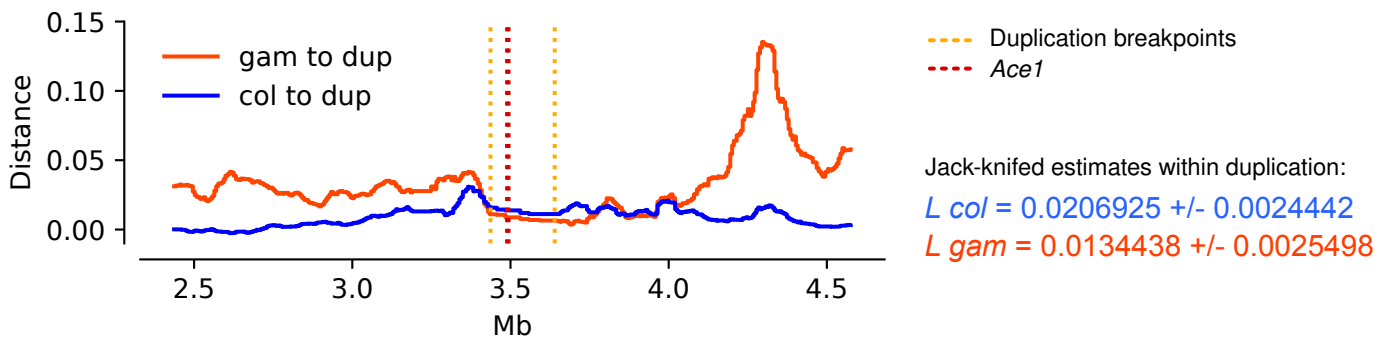

### B) Distance from *A. gambiae* duplicated specimens

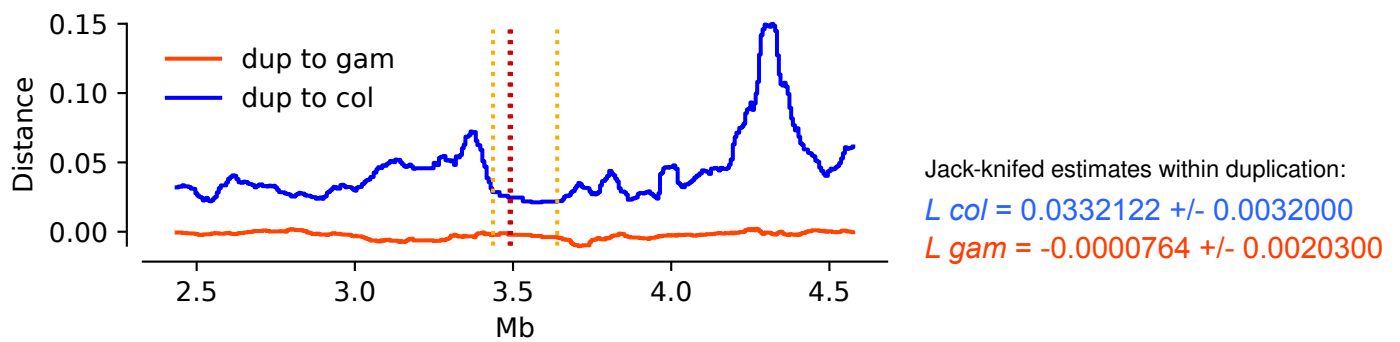

Supplement: pgen.1009253.s018.pdf [file pgen.1009253.s018.pdf]
